# Supplementary material
Source: PubMed Central journal article supplement (PMC3101998)
Supplement: emboj201192s4.pdf [file emboj201192s4.pdf]

# Supplementary information

## Transcriptome asymmetry within mouse zygotes but not between early embryonic

### 5 **sister blastomeres**

**Matthew D. VerMilyea<sup>1,6</sup>, Matthias Maneck<sup>2,3,6</sup>, Naoko Yoshida<sup>1,4</sup>,  
Isabell Blochberger<sup>2</sup>, Emi Suzuki<sup>1</sup>, Toru Suzuki<sup>1,5</sup>, Rainer Spang<sup>3</sup>,  
Christoph A. Klein<sup>2,7,\*</sup> and Anthony C. F. Perry<sup>1,5,7,\*</sup>**

10

<sup>1</sup>Laboratory of Mammalian Molecular Embryology, RIKEN Center for Developmental Biology, 2-2-3  
Minatojima Minamimachi, Chuo-ku, Kobe 650-0047 Japan. <sup>2</sup>Chair of Experimental Medicine and Therapy  
Research, Department of Pathology, <sup>3</sup>Institute of Functional Genomics, University of Regensburg, Franz-  
Josef-Strauß-Allee 11, 93053 Regensburg, Germany. <sup>4</sup>Department of Biomedical Sciences, Ritsumeikan  
15 University, Shiga 525-8577, Japan. <sup>5</sup>Laboratory of Mammalian Molecular Embryology, Bath Centre for  
Regenerative Medicine and Department of Biology and Biochemistry, University of Bath, BA2 7AY, England

15

\*Corresponding authors. CA Klein, Chair of Experimental Medicine and Therapy Research, Department of  
Pathology, University of Regensburg, Franz-Josef-Strauß-Allee 11, 93053 Regensburg, Germany. Tel.: +49  
20 941 944 6720; Fax: +49 941 944 6719; E-mail: christoph.klein@klinik.uni-regensburg.de or ACF Perry,  
Laboratory of Mammalian Molecular Embryology, Bath Centre for Regenerative Medicine and Department of

20

Biology and Biochemistry, University of Bath, BA2 7AY, England. Tel.: +44 1225 386 936; Fax: +44 1225 386 779; E-mail: perry135@aol.com

<sup>6</sup>These authors contributed equally to this work

<sup>7</sup>Cosenior authors

## **Supplementary materials and methods**

### ***Collection and culture of immature oocytes***

For movies to monitor mitochondrial localization, fully-grown germinal vesicle (GV) oocyte-cumulus cell complexes were collected from 7-9-week-old transgenic females expressing mitochondrially-targeted Venus (mitoVenus) protein (Shoji *et al*, 2006) 44 to 48 hours after intraperitoneal injection of eCG. Following 1 hour of culture in Waymouth medium (Waymouth, 1959) supplemented with 10% (v/v) fetal calf serum (FCS), cumulus cells were displaced from GV oocytes by repeated pipetting in TaM medium (Miki *et al*, 2006) supplemented with 10% (v/v) FCS and 150  $\mu$ M isobutylmethylxanthine (IBMX). The immature oocytes were held in TaM medium containing 150  $\mu$ M IBMX until micromanipulation and without it afterwards. Oocyte and embryo culture was in humidified CO<sub>2</sub> (5% [v/v] in air) at 37°C.

### ***Real-time fluorescence imaging***

Mitochondrial tracking during in vitro maturation and following mII exit was in oocytes expressing mitoVenus (Shoji *et al*, 2006). Oocytes were placed in a KSOM droplet under mineral oil on a glass-bottomed dish on the stage of a TE2000 inverted microscope (Nikon, Japan) equipped with a CSU10 confocal scanning unit (Yokogawa, Japan) and a humidified chamber (5% [v/v] CO<sub>2</sub> in air) at 37°C. DIC images and fluorescent (488 nm) images (typically 13 focal planes, step size = 2  $\mu$ m) were captured at 5 minute intervals by a C9100-13 ImagEM EM-CCD camera (Hamamatsu Photonics, Shizuoka, Japan) driven by MetaMorph (Molecular Devices, CA, USA) image analysis software.

## Supplementary references

- Alizadeh Z, Kageyama S, Aoki F (2005) Degradation of maternal mRNA in mouse embryos: selective degradation of specific mRNAs after fertilization. *Mol Reprod Dev* **72**: 281-290
- 5 Hiiragi T, Solter D (2004) First cleavage plane of the mouse egg is not predetermined but defined by the topology of the two apposing pronuclei. *Nature* **430**: 360-364
- Kurotaki Y, Hatta K, Nakao K, Nabeshima Y, Fujimori T (2007) Blastocyst axis is specified independently of early cell lineage but aligns with the ZP shape. *Science* **316**: 719-723
- 10 Miki H, Ogonuki N, Inoue K, Baba T, Ogura A (2006) Improvement of cumulus-free oocyte maturation *in vitro* and its application to microinsemination with primary spermatocytes in mice. *J Reprod Dev* **52**: 239-48
- Plusa B, Hadjantonakis AK, Gray D, Piotrowska-Nitsche K, Jedrusik A, Papaioannou VE, Glover DM, Zernicka-Goetz M (2005) The first cleavage of the mouse zygote predicts the blastocyst axis. *Nature* **434**: 391-395
- 15 Shoji S, Yoshida N, Amanai M, Ohgishi M, Fukui T, Fujimoto S, Nakano Y, Kajikawa E, Perry ACF (2006) Mammalian Emi2 mediates cytostatic arrest and transduces the signal for meiotic exit *via* Cdc20. *EMBO J* **25**: 834-845
- Smyth GK, Speed TP (2003) Normalization of cDNA microarray data. *Methods* **31**: 265-273
- 20 Waymouth C (1959) Rapid proliferation of sublines of NCTC clone 929 (strain L) mouse cells in a simple chemically defined medium (MB 752/1). *J Natl Cancer Inst* **22**: 1003-1017

## Supplementary figure legends

**Figure S1** Three models relating physiological pre-patterning to cell lineage specification in pre-implantation embryos. The models each represent the fates of two lineages arising from hypothetical blastomeres A and B of a 2-cell (2C) embryo. (A) Blastomeres A and B inherit distinct sets of maternal molecules (eg mRNAs) and are functionally non-equivalent. Daughters of one of them (in this case, lineage A) preferentially segregate to the morula interior to give rise to cells of the inner cell mass (ICM) and, in turn, epiblasts and the primitive endoderm (not shown) in 64-cell (64C) blastocysts (Plusa *et al*, 2005).

(B) Blastomeres A and B inherit indistinguishable sets of maternal molecules and are functionally equivalent. The daughters of lineages A and B accordingly contribute randomly to pre-implantation embryonic specification (Hiiragi and Solter, 2004; Kurotaki *et al*, 2007).

(C) Blastomeres A and B inherit distinct sets of maternal molecules and, is per (A) are functionally non-equivalent. Segregation is initially random, but internal morula cells of lineage A rapidly respond to the microenvironment of the morula interior and induce many of the neighboring (internal) cells of lineage B to do the same, so that many lineages at that location become ICM progenitors. The prompt and timely response of internal lineage A cells ensures coordinated development of the ICM and the embryo as a whole. The default pathway for all exterior cells is to trophoctoderm (TE). Embryos split at the 2-cell stage are also able to develop fully, although note that the environment of each is non-physiological and the first mitotic cell cycle is effectively repeated. This model does not predict whether asymmetric inheritance at the 2-cell stage is transmitted along resultants lineages. Some maternal mRNAs are degraded in the mouse (Alizadeh *et al*, 2004), but even transient asymmetry at the 2-cell stage may be sufficient to affect lineage fate. The pre-patterning/induction model of (C) is compatible with reports that support random (stochastic) determination, such as the one of (B) (Kurotaki *et al*, 2007).

**Figure S2** Sets of transcripts enriched in spindle and Pb<sub>2</sub> overlap. The observed overlap size between the top ranking mRNAs from lists of enriched mRNAs in the spindle (Supplementary Table S1) and Pb<sub>2</sub> (Supplementary Table S3) is significantly greater than the magnitudes of overlaps expected for randomly-selected mRNAs. Vertical orange bars indicate the spread of overlap sizes that occur if transcripts are chosen at random from both lists.

**Figure S3** Pb<sub>2</sub>-zygote segregation of mitochondria and RNAs associated with mouse oocyte polarity. (A) Paired DIC (upper) and fluorescence video captures of a representative mitoVenus-expressing oocyte, recorded at 5 minute intervals starting 30 minutes after sperm entry. The emergent Pb<sub>2</sub> in the final frame is marked with a red arrowhead. Bar = 50 μm. (B) Mitochondrial genomic DNA *mt-Co1* qPCR analysis in Pb<sub>2</sub>-zygote couplets against an endogenous *Actb* genomic DNA standard, with the zygote value (open box) set at 1.0. (C) Comparative qPCR analysis respectively of spindle-oocyte (spin) and Pb<sub>2</sub>-zygote (Pb<sub>2</sub>) couplets shown as a -fold change in RQ values (spin/Pb<sub>2</sub> relative to oocyte/zygote) as per Figure 1B. RQ values were normalized against *H3f3a* (Supplementary Figure S5). A boxed inset gives  $p_{\text{adj}}$  values from microarray analysis (Supplementary Table S3) suggesting no significant Pb<sub>2</sub>-zygote difference. RNAs correspond to the following with previously-reported non-uniform distributions in mouse oocytes: 16S mitochondrial RNA (*16S*), Stat3 protein (*Stat3*) and Leptin protein (*Lep*).

**Figure S4** Relationships between experimental samples. Schematic summarizing relationships between the principal samples analyzed in this work.

**Figure S5** PCR Standard Selection. Threshold cycle ( $C_t$ ) values for candidate qPCR standards (CT) in the four principle sample types obtained microsurgically from mII oocytes in the present work (see Figures 1A and 1D).

## Supplementary table legends

**Table S1** Differential gene expression analysis performed in R using the Limma package (Smyth and Speed, 2003) for matched spindle-oocyte samples. A positive logFC indicates relatively high levels in the spindle; a negative logFC indicates relatively low levels in the spindle.

**Table S3** Differential gene expression analysis performed in R using the Limma package (Smyth and Speed, 2003) for matched Pb<sub>2</sub>-zygote samples. A positive logFC indicates relatively high levels in the Pb<sub>2</sub>; a negative logFC indicates relatively low levels in the Pb<sub>2</sub>.

**Table S5** Genes differentially expressed between the two comparisons (higher in Pb<sub>2</sub> and lower in spindle, or lower in Pb<sub>2</sub> and higher in spindle). A positive logFC indicates higher levels in the Pb<sub>2</sub> compared to zygote and lower in spindle compared to oocyte; a negative logFC indicates lower levels in the Pb<sub>2</sub> compared to zygote and higher levels in the spindle compared to the oocyte.

Array data are deposited at the Gene Expression omnibus (GEO) with the accession number, GSE27396:

<http://www.ncbi.nlm.nih.gov/geo/query/acc.cgi?token=ljcljmkyyuoawjo&acc=GSE27396>



**Figure S1**



**Figure S2**

**A****B****C****Figure S3**



**Figure S4**



couplet [ □ mll minus spindle (enucleated) □ mll minus <opposite spindle>  
■ spindle sample ■ <opposite spindle> sample



**Figure S5**

**Table S2. Spindle vs oocyte qPCR and corresponding microarray analyses**

$p_{adj}$ , adjusted  $p$  value. Note that position number, not row number, is shown (position no. = row no. -1) from Table S1. LogFC with a positive value (+) predicts spindle>mII oocyte.  $p_{adj}$  <0.05 shown in red.

| Sequence      | paired | $p_{adj}$ | logFC |
|---------------|--------|-----------|-------|
| mrpl13        | 315    | 0.042     | +     |
| mrpl55        | 17     | 0.002     | +     |
| Cd52          | 639    | 0.073     | +     |
| Dach1         | 33,545 | 0.981     | -     |
| Twf1          | 1,723  | 0.168     | +     |
| Actb          | 6,760  | 0.446     | +     |
| Sat1          | 24,404 | 0.879     | +     |
| Ccdc72        | 9,955  | 0.571     | +     |
| Rsu1          | 745    | 0.085     | -     |
| H2afx         | 28,576 | 0.933     | +     |
| Tapbp         | 12,959 | 0.661     | +     |
| BC088983      | 741    | 0.085     | -     |
| Ddx59         | 1,324  | 0.130     | -     |
| Rbm22         | 4,027  | 0.313     | -     |
| Ripk2         | 2,391  | 0.213     | -     |
| Becn1         | 14,845 | 0.700     | -     |
| Atp1a1        | 4,927  | 0.363     | -     |
| Tnks          | 14,038 | 0.682     | -     |
| Cenpe         | 35,174 | 0.993     | +     |
| Ica1          | 14,553 | 0.692     | -     |
| Sf3b1         | 19,983 | 0.805     | -     |
| Cdc20         | 1,885  | 0.174     | -     |
| Ptov          | 3,177  | 0.259     | +     |
| 2610110g12Rik | 21,266 | 0.829     | +     |
| Prr7          | 34,703 | 0.990     | -     |
| Klk13         | 2,817  | 0.239     | -     |
| Daf2          | 15,039 | 0.704     | +     |
| Rshl2a        | 97     | 0.016     | -     |
| Mtpn          | 11,657 | 0.628     | -     |
| Ubl3          | 24,074 | 0.875     | -     |

**Table S4. Pb<sub>2</sub> vs zygote qPCR and corresponding microarray analyses**

$p_{adj}$ , adjusted  $p$  value. Note that position number, not row number, is shown (position no. = row no. -1) from Table S3. LogFC with a positive value (+) predicts Pb<sub>2</sub>>zygote.  $p_{adj} < 0.05$  shown in red.

| Sequence      | position | $p_{adj}$ | logFC |
|---------------|----------|-----------|-------|
| mrpl13        | 238      | 0.011     | +     |
| mrpl55        | 73       | 0.004     | +     |
| Cd52          | 779      | 0.035     | +     |
| Dach1         | 1,261    | 0.059     | +     |
| Twf1          | 167      | 0.008     | +     |
| Actb          | 5,289    | 0.235     | +     |
| Sat1          | 208      | 0.009     | +     |
| Ccdc72        | 280      | 0.028     | +     |
| Rsu1          | 2,604    | 0.118     | +     |
| H2afx         | 407      | 0.016     | +     |
| Tapbp         | 4,500    | 0.201     | +     |
| BC088983      | 10       | 0.001     | -     |
| Ddx59         | 32       | 0.002     | -     |
| Rbm22         | 2,680    | 0.122     | -     |
| Ripk2         | 13       | 0.001     | -     |
| Becn1         | 1,471    | 0.068     | -     |
| Atp1a1        | 107      | 0.005     | -     |
| Tnks          | 123      | 0.005     | -     |
| Cenpe         | 1,783    | 0.083     | -     |
| Ica1          | 4,140    | 0.184     | -     |
| Sf3b1         | 7,791    | 0.331     | -     |
| Cdc20         | 242      | 0.011     | -     |
| Ptov          | 14,641   | 0.559     | +     |
| 2610110g12Rik | 15,784   | 0.593     | +     |
| Prr7          | 2,990    | 0.136     | -     |
| Klk13         | 2,783    | 0.126     | +     |
| Daf2          | 4,307    | 0.191     | +     |
| Rshl2a        | 15,448   | 0.584     | +     |
| Mtpn          | 2,414    | 0.110     | -     |
| Ubl3          | 15,721   | 0.592     | -     |

**Table S6. No marked correspondence between enrichment of mRNAs in *Pb<sub>2</sub>*/zygote and in *Xenopus* or human microtubules**

$p_{adj}$ , adjusted  $p$  values in paired setting. Values for spindle-mII oocyte couplets (spin-mII) are from Table S1, and those for second polar body-zygote couplets (*Pb<sub>2</sub>*-zygote) are from Table S3. Each shows position no., not row no. (position no. = row no. -1). LogFC are given; a positive value (+) predicts spin>mII or *Pb<sub>2</sub>*>zygote. All sequences were selected and searched where  $p < 0.05$  for *Xenopus* and/or human, taken from Blower et al., 2007.

**$p < 0.05$ , *Xenopus***

| XI Gene name | XI Log2 (MT/total) | XI p-value  | polysome enrichment | Hum gene name | Hum Log2 (Mt/total) | Hum p-value | spin-mII | <i>Pb<sub>2</sub></i> -zygote | Lowest $p_{adj}$                                  |
|--------------|--------------------|-------------|---------------------|---------------|---------------------|-------------|----------|-------------------------------|---------------------------------------------------|
| cenpe-A      | 2.291030504        | 0.014434491 | 14.35618364         | CENPE         | 0.82699099          | 0.009340004 | 35,174   | 1,783                         | $p_{adj}$ <i>Pb<sub>2</sub></i> -zygote=0.083 (-) |
| kif2c        | 0.707022245        | 0.045689399 | 13.4941008          | KIF2C         | -0.134948026        | 0.847522584 | 27,194   | 10,339                        |                                                   |
| TPX2         | 0.667149477        | 0.024565963 | 13.9809868          | TPX2          | -0.189446059        | 0.794693028 | 22,027   | 10,398                        |                                                   |
| Fzd7         | 0.65607925         | 0.005085621 | 12.65569241         | FZD7          | 0.81224496          | 0.557071824 | 31,110   | 7,116                         |                                                   |
| ahsa1        | 0.617485507        | 0.019168603 | 12.08716718         | AHSA1         | 0.177019199         | 0.830328847 | 33,667   | 8,395                         |                                                   |
| wdr23        | 0.456788541        | 0.00605576  | 9.893581433         | WDR23         | -0.696196529        | 0.189931244 | 22,717   | 15,048                        |                                                   |
| dbr1         | 0.440371158        | 0.037942005 | 10.43843054         | DBR1          | -0.139165918        | 0.892648221 | 33,975   | 31,815                        |                                                   |
| ppp1ca       | 0.411460017        | 0.006204685 | 13.2715399          | PPP1CA        | -0.027574463        | 0.953676683 | 5,275    | 27,565                        | $p_{adj}$ spin-mII=0.378 (+)                      |
| Sfrs1        | 0.341660065        | 0.03650361  | 13.04739205         | SFRS1         | 0.584064634         | 0.615844314 | 10,632   | 22,205                        |                                                   |
| ube2r2       | 0.316462818        | 0.045793425 | 11.29881947         | UBE2R2        | 0.020019822         | 0.983931062 | 35,210   | 20,809                        |                                                   |
| gnai3        | 0.221482938        | 0.033674428 | 12.17328066         | GNAI3         | -0.003516342        | 0.997410992 | 20,165   | 14,790                        |                                                   |

**$p < 0.05$ , Human**

| XI Gene name | XI Log2 (MT/total) | XI p-value  | polysome enrichment | Hum gene name | Hum Log2 (Mt/total) | Hum p-value | spin-mII | <i>Pb<sub>2</sub></i> -zygote | Lowest $p_{adj}$                                  |
|--------------|--------------------|-------------|---------------------|---------------|---------------------|-------------|----------|-------------------------------|---------------------------------------------------|
| cenpe-A      | 2.291030504        | 0.014434491 | 14.35618364         | CENPE         | 0.82699099          | 0.009340004 | 35,174   | 1,783                         | $p_{adj}$ <i>Pb<sub>2</sub></i> -zygote=0.083 (-) |
| mcm7         | 0.80316826         | 0.141637931 | 14.04891801         | MCM7          | 1.039992656         | 0.01648752  | 5,303    | 19,591                        | $p_{adj}$ spin-mII=0.379 (-)                      |
| Xe-Wee1A     | 0.596412137        | 0.109621888 | 13.91992331         | WEE1          | 1.102939937         | 0.008097551 | 23,205   | 31,566                        |                                                   |
| tpr          | 0.530048162        | 0.18158509  | 14.00722159         | TPR           | 1.13175161          | 0.045389788 | 31,811   | 4,129                         | $p_{adj}$ <i>Pb<sub>2</sub></i> -zygote=0.183 (-) |
| ddx39        | 0.327671262        | 0.120172918 | 14.10299638         | DDX39         | 0.764752439         | 0.049275213 | 15,268   | 31,937                        |                                                   |
| ppp1cc       | 0.316420473        | 0.185544551 | 13.00501458         | PPP1CC        | -1.498378956        | 0.034601549 | 9,116    | 3,759                         | $p_{adj}$ <i>Pb<sub>2</sub></i> -zygote=0.171 (+) |
| Ptk2         | 0.184324621        | 0.050856873 | 10.20242115         | PTK2          | -3.513329867        | 0.020000133 | 34,143   | 27,614                        |                                                   |

**Table S7. Polar mRNAs localized to the *Xenopus* animal hemisphere and Pb<sub>2</sub>-zygote segregation in mouse counterparts**

Position numbers are shown (position no. = row no. -1) from Table S3. LogFC with a positive value (+) predicts Pb<sub>2</sub>>zygote.  $p_{adj} < 0.05$  shown in red.

| Name    | <i>Xenopus</i> prot (aa) | <i>Mus</i> prot (aa) | <i>Mus</i> mRNA | position | $p_{adj}$ | Notes ( <i>UniGene</i> expression)                                                                                                                                                                                                                                                                                              |
|---------|--------------------------|----------------------|-----------------|----------|-----------|---------------------------------------------------------------------------------------------------------------------------------------------------------------------------------------------------------------------------------------------------------------------------------------------------------------------------------|
| βTrCP   | Q91854 (518)             | NP_033901 (569)      | NM_009771       | 30,613   | 0.918 (-) | <u>Similar.</u> <i>Btrc</i> mRNA: <i>zyg</i> , 473; <i>brain</i> , 225; <i>testis</i> , 76. <i>mll</i> , <i>zyg</i> = 245, 458. NF: NM_009771, Btrc, TrCP.                                                                                                                                                                      |
| An2     | NP_001081246 (553)       | NP_031531 (553)      | NM_007505       | 15,418   | 0.583 (+) | <i>Mus</i> ATP synthase, H <sup>+</sup> transporting, mitochondrial F1 complex, alpha subunit, isoform 1 identities = 515/552 (93%). <u>Similar.</u> <i>Atp5a1</i> mRNA: <i>zyg</i> , 72; <i>brain</i> , 175; <i>testis</i> , 42. <i>mll</i> , <i>zyg</i> = 196, 70. NF: NM_007505, An2, Atp5a1.                                |
| An3     | P24346 (697)             | NP_034158 (662)      | NM_010028       | 27,245   | 0.858 (-) | <i>Mus</i> DEAD/H (Asp-Glu-Ala-Asp/His) box polypeptide 3, X-linked identities = 558/708 (78%). <u>Similar.</u> <i>Ddx3x</i> mRNA: <i>zyg</i> , 0; <i>brain</i> , 0; <i>testis</i> , 0. <i>mll</i> , <i>zyg</i> = 49, 0. NF: NM_010028, An3, Ddx3x.                                                                             |
| xlan4   | AAA73357 (315)           | EDL00149 (436)       | NM_198127       | 18,273   | 0.656 (-) | <i>Xenopus</i> aka animal 4. <i>Mus</i> abl-interactor 2 identities = 294/317 (92%). <u>Similar.</u> <i>Abi2</i> mRNA: <i>zyg</i> , 0; <i>brain</i> , 164; <i>testis</i> , 50. <i>mll</i> , <i>zyg</i> = 0, 0. NF: NM_198127, xlan4, Abi2, abl-interactor 2.                                                                    |
| FN      | NP_001081270 (2481)      | NP_034363 (2477)     | NM_010233       | 23,733   | 0.793 (-) | Fibronectin. Identities = 1750/2456 (71%). <u>Similar.</u> <i fn1<="" i=""> mRNA: <i>zyg</i>, 0; <i>brain</i>, 111; <i>testis</i>, 177. <i>mll</i>, <i>zyg</i> = 0, 0. NF: NM_010233, FN, Fibronectin.</i>                                                                                                                      |
| xIPou60 | NP_001081583 (426)       | NP_032926 (497)      | NM_008900       | 6,388    | 0.278 (-) | POU domain, class 3, transcription factor 3 (Brain-specific homeobox/POU domain protein 1) (Brn-1 protein). Like Oct4. Identities = 91/155 (58%). <u>Related.</u> <i>Pou3f3</i> mRNA: <i>zyg</i> , 0; <i>brain</i> , 33; <i>testis</i> , 0. <i>mll</i> , <i>zyg</i> = 0, 0. NF: NM_008900, xIPou60, Brn-1, Brn 1, Brn1, Pou3f3. |
| Tcf-1   | NP_001082691 (464)       | NP_034833 (397)      | NM_010703       | 104      | 0.005 (-) | <i>Mus</i> lymphoid enhancer binding factor 1. Identities = 224/382 (58%). <u>Related.</u> <i>Lef1</i> mRNA: <i>zyg</i> , 182; <i>brain</i> , 18; <i>testis</i> , 76. <i>mll</i> , <i>zyg</i> = 0, 176. NF: NM_010703, Tcf-1, lymphoid enhancer binding factor, Lef1.                                                           |

**Table S8. Polar mRNAs localized to the *Xenopus* vegetal hemisphere and Pb<sub>2</sub>-zygote segregation in mouse counterparts**Position numbers are shown (position no. = row no. -1) from Table S3. LogFC with a positive value (+) predicts Pb<sub>2</sub>>zygote.

| Name    | <i>Xenopus</i> prot (aa) | <i>Mus</i> prot (aa) | <i>Mus</i> mRNA | position | $p_{adj}$ | Notes ( <i>UniGene</i> expression)                                                                                                                                                                                                                                                                                                                             |
|---------|--------------------------|----------------------|-----------------|----------|-----------|----------------------------------------------------------------------------------------------------------------------------------------------------------------------------------------------------------------------------------------------------------------------------------------------------------------------------------------------------------------|
| βTrCP   | Q91854 (518)             | NP_033901 (569)      | NM_009771       | 30,613   | 0.918 (-) | <u>Similar</u> . <i>Btrc</i> mRNA: <i>zyg</i> , 473; <i>brain</i> , 225; <i>testis</i> , 76. <i>mll</i> , <i>zyg</i> = 245, 458. NF: NM_009771, Btrc, TrCP.                                                                                                                                                                                                    |
| VegT    | AAB93301 (455)           | AAC53110 (540)       | NM_011538       | 30,341   | 0.913 (-) | Mouse seq is ortholog of Tbx6; Tbx6 also exists in <i>Xenopus</i> , but in Blast of <i>Xenopus</i> VegT, the first <i>Mus</i> hit is with Tbx6. <u>Related</u> . <i>Tbx6</i> mRNA: <i>zyg</i> , 0; <i>brain</i> , 0; <i>testis</i> , 0. <i>Restricted to juvenile</i> . <i>mll</i> , <i>zyg</i> = 0, 0. NF: AY654733, VegT, Tbx6.                              |
| Vg1     | AAH90232 (361)           | NP_032134 (366)      | NM_008108       | 22,739   | 0.771 (-) | Mouse seq is growth differentiation factor 3 (Gdf3). <i>Xenopus</i> also has a Gdf3-like protein called Derriere. <u>Related</u> . <i>Gdf3</i> mRNA: <i>zyg</i> , 0; <i>brain</i> , 0; <i>testis</i> , 0. <i>Restricted to blastocyst</i> . <i>mll</i> , <i>zyg</i> = 0, 0. NF: NM_008108, Vg1, Gdf3.                                                          |
| Xcat-2  | CAA51067 (128)           | NP_918953 (136)      | NM_194064       | 20,407   | 0.711 (-) | Mouse seq is Nanos homologue 2; 41% identities over 111. <u>Similar</u> . Nanos1 also similar (69% over 56). <i>Nanos2</i> mRNA: <i>zyg</i> , 0; <i>brain</i> , 0; <i>testis</i> , 0. <i>Restricted to ovary</i> . <i>mll</i> , <i>zyg</i> = 0, 0. NF: NM_194064, Xcat-2, Nanos.                                                                               |
| Xcat-3  | Q9DGP9 (483)             | NP_031942 (478)      | NM_007916       | 1,870    | 0.087 (-) | <i>Xenopus</i> protein is ATP-dependent RNA helicase DDX25 (Dead South RAN helicase; Zn-responsive). <i>Mus</i> , Ddx19-like protein, is very like Xcat3 (292/423 identity = 69%). <u>Similar</u> . <i>Ddx19a</i> mRNA: <i>zyg</i> , 145; <i>brain</i> , 86; <i>testis</i> , 110. <i>mll</i> , <i>zyg</i> = 0, 140. NF: NM_007916, Xcat-3, ddx25, ddx19.       |
| Xdazl   | O57437 (286)             | NP_034151 (298)      | NM_010021       | 1,741    | 0.082 (-) | <i>Xenopus</i> is deleted in azoospermia-like-A (DAZ-like protein A). <i>Mus</i> deleted in azoospermia-like. Identities = 161/270 (59%). <u>Similar</u> . <i>Dazl</i> mRNA: <i>zyg</i> , 2477; <i>brain</i> , 10; <i>testis</i> , 896. <i>Restricted to ovary and unfertilized ovum</i> . <i>mll</i> , <i>zyg</i> = 18,953, 2,395. NF: NM_010021, Xdazl, DAZ. |
| xpat    | CAA05358 (293)           | none                 | none            |          |           | No clearly-related protein sequences; xpat not found.                                                                                                                                                                                                                                                                                                          |
| Xwnt-11 | NP_001084327 (353)       | NP_033545 (354)      | NM_009519       | 11,778   | 0.470 (+) | Mouse wingless-related MMTV integration site 11 (Wnt11) identities = 221/337 (65%). <u>Similar</u> . <i>Wnt11</i> mRNA: <i>zyg</i> , 0; <i>brain</i> , 0; <i>testis</i> , 16. <i>Expressed in oviduct</i> (274). <i>mll</i> , <i>zyg</i> = 0, 0. NF: NM_009519, Xwnt, Wnt11,                                                                                   |

|               |                    |                 |           |        |           |                                                                                                                                                                                                                                                                                                                |
|---------------|--------------------|-----------------|-----------|--------|-----------|----------------------------------------------------------------------------------------------------------------------------------------------------------------------------------------------------------------------------------------------------------------------------------------------------------------|
|               |                    |                 |           |        |           | Wnt-11, Wnt 11.                                                                                                                                                                                                                                                                                                |
| fatvg         | NP_001081960 (428) | P43883 (425)    | NM_007408 | 15,130 | 0.574 (+) | <i>Mus</i> is perilipin 2 (Plin2) identities = 237/407 (58%). <u>Related</u> . <i>Plin2 mRNA: zyg, 109; brain, 21; testis, 33. mll, zyg = 98, 105.</i> NF: NM_007408, fatvg, Adipophilin, ADRP, Adfp. Listed as Adfp.                                                                                          |
| xvelo1        | AAP43960 (779)     | none            | none      |        |           | No clearly related protein sequences; xvelo1 not found.                                                                                                                                                                                                                                                        |
| XNIF          | AAP43959 (276)     | NP_598471 (276) | NM_133710 | 34,595 | 0.983 (-) | <i>Mus</i> CTD (carboxy-terminal domain, RNA polymerase II, polypeptide A) small phosphatase-like, identities = 224/277 (80%). <u>Similar</u> . <i>Ctdspl mRNA: zyg, 36; brain, 23; testis, 33. mll, zyg = 49, 35.</i> NF: NM_133710, XNIF, Ctdspl.                                                            |
| Xlerk         | NP_001080948 (329) | NP_034240 (345) | NM_010110 | 21,856 | 0.745 (+) | <i>Xen</i> and <i>Mus</i> is ephrin-B1 (EPH family ligand). <i>Mus</i> (aka LERK-2) identities = 242/329 (73%). <u>Similar</u> . <i>Efnb1 mRNA: zyg, 0; brain, 23; testis, 8. Expressed in oviduct (548). mll, zyg = 0, 0.</i> NF: NM_010110, Xlerk, ephrin-B1, LERK-2, LERK 2, LERK2, Efnb1.                  |
| Germes        | NP_001082512 (587) | none            | none      |        |           | No clearly related protein sequences; Germes not found.                                                                                                                                                                                                                                                        |
| Hermes        | NP_001081864 (196) | NP_082306 (206) | NM_028030 | 5,933  | 0.260 (-) | RRM-type RNA-binding protein hermes. Identities = 164/206 (79%). <u>Similar</u> . <i>Rbpms2 mRNA: zyg, 72; brain, 14; testis, 16. mll, zyg = 343, 70.</i> Not found: NM_028030, Hermes, Rbpms2.                                                                                                                |
| C3H-3         | NP_001081886 (364) | NP_031590 (338) | NM_007564 | 10,547 | 0.432 (-) | Related to <i>Mus</i> zinc finger protein 36, C3H type-like 1, identities = 203/378 (53%). <u>Related</u> . <i>Zfp3611 mRNA: zyg, 0; brain, 37; testis, 42. mll, zyg = 0, 0.</i> NF: NM_007564, C3H-3, Zfp3611.                                                                                                |
| xARH $\alpha$ | Q801G1 (309)       | NP_663529 (308) | NM_145554 | 7,496  | 0.319 (+) | Low density lipoprotein receptor adapter protein 1-A (Autosomal recessive hypercholesterolemia protein homolog alpha) (ARH alpha) (xARH) (Xcat4). <i>Mus</i> identities = 219/311 (70%). <u>Similar</u> . <i>Ldlrap1 mRNA: zyg, 0; brain, 14; testis, 0. mll, zyg = 0, 0.</i> NF: NM_145554, xARH, Xcat4, ARH. |

**Table S9. Pb<sub>2</sub>-zygote differential transcripts that are abundant during oocyte maturation**

Sequences are taken from Wang et al. (2004). Values in paired column show position no., not row no. (position no. = row no. -1) from Table S3. LogFC with a positive value (+) predicts Pb<sub>2</sub>>zygote.  $p_{adj} < 0.05$  shown in red. Where multiple matches exist (eg for Hmgcr) the highest is shown.

| Sequence           | paired    | $p_{adj}$ | logFC |
|--------------------|-----------|-----------|-------|
| Atp1a1             | 107       | 0.005     | -     |
| Il1r1              | 7,324     |           |       |
| Por                | 24,787    |           |       |
| Evx1               | 19,703    |           |       |
| Dag1               | 125       | 0.006     | -     |
| Pparg              | 31,192    |           |       |
| Gas6               | 14,104    |           |       |
| Daxx               | 15,575    |           |       |
| Rnaseh1            | 4,065     |           |       |
| Hmgcr              | 3,604     |           |       |
| Tpra1              | not found |           |       |
| Lepr               | 30,441    |           |       |
| Col4a1             | 29,259    |           |       |
| Psmb3              | 24,799    |           |       |
| Klra3              | 249       |           | +     |
| Gspt2              | 10,611    |           |       |
| nuclear protein 95 | not found |           |       |
| Nfkbia             | 333       | 0.014     | -     |
| Plxna2             | 20,998    |           |       |
| Prep               | 3,458     |           |       |
| Gorasp2            | 772       | 0.034     | -     |
| Dtymk              | 18,046    |           |       |
| Slc12a7            | 22,843    |           |       |
| Plat               | 5         | 0.000     | -     |
| Pcbp2              | 1,347     |           |       |
| Ube2h              | 766       | 0.034     | -     |
| Efna4              | 3,195     |           |       |
| Lama2              | 22,929    |           |       |
| Txnip              | 14,255    |           |       |
| Lamb1-1            | 2,676     |           |       |
| Psma2              | 3,027     |           |       |
| Itpr2              | 32,320    |           |       |
| Orc5l              | 20,285    |           |       |
| Aup1               | 11,487    |           |       |
| Wars               | 6,001     |           |       |
| Myd88              | 2,386     |           |       |
| BANP homolog       | not found |           |       |
| Eef1b2             | 31,632    |           |       |
| Rdh11              | 4,522     |           |       |
| Mum1l1             | 24,548    |           |       |
| UBE-1c3            | not found |           |       |
| Rdx                | 1,488     |           |       |
| Usp2               | 28,166    |           |       |
| Ppib               | 13,829    |           |       |
| Magea7             | 23,287    |           |       |

|                   |        |       |   |
|-------------------|--------|-------|---|
| Xtrp3s1           | 5,403  |       |   |
| Mbl2              | 34,796 |       |   |
| Cd160             | 802    | 0.036 | - |
| Celsr1            | 6,201  |       |   |
| Ext2              | 3,709  |       |   |
| Slc19a1           | 30,926 |       |   |
| Mos               | 35,437 |       |   |
| Hdh               | 9,291  |       |   |
| Cnih2             | 9,374  |       |   |
| Pdcd7             | 24,906 |       |   |
| Psma5             | 27,453 |       |   |
| ligp2 (now Irgm2) | 1,715  |       |   |

**Table S10. Pb<sub>2</sub>-zygote segregation of transcription factor mRNAs that are potentially discriminatory in 16-cell embryos**

Sequences are taken from Guo et al. (2010).  $p_{adj}$ , adjusted  $p$  value. Values in paired column show position no., not row no. (position no. = row no. -1) from Table S3. LogFC with a positive value (+) predicts Pb<sub>2</sub>>zygote.  $p_{adj} < 0.05$  shown in red. The highest table position is given where there are multiple matches (eg Sall4 and Tcf23).

| Sequence                | position  | $p_{adj}$    | logFC    |
|-------------------------|-----------|--------------|----------|
| Actb                    | 5,289     | 0.235        | +        |
| Ahcy                    | 16,428    | 0.611        | +        |
| Aqp3                    | 24,524    | 0.807        | +        |
| Atp12a                  | 3,304     | 0.151        | +        |
| Bmp4                    | 5,955     | 0.260        | +        |
| Cdx2                    | 9,221     | 0.385        | -        |
| Cebpa                   | 16,045    | 0.600        | +        |
| Creb3l2                 | 26,489    | 0.845        | -        |
| Dab2<br>(D630005B22Rik) | 5,452     | 0.241        | -        |
| Dppa1                   | 30,902    | 0.924        | -        |
| Eomes                   | 30,198    | 0.910        | +        |
| Esrrb                   | 28,726    | 0.885        | +        |
| Fgf4                    | 10,131    | 0.419        | +        |
| Fgfr2                   | 24,348    | 0.803        | -        |
| Fn1                     | 23,733    | 0.793        | -        |
| Gapdh                   | 6,954     | 0.299        | +        |
| Gata3                   | 30,913    | 0.924        | -        |
| Gata4                   | 30,574    | 0.917        | -        |
| Gata6                   | 7,067     | 0.305        | +        |
| Grhl1                   | 25,906    | 0.834        | -        |
| Grhl2                   | 14,113    | 0.543        | -        |
| Hand1                   | 13,632    | 0.529        | -        |
| Hnf4a                   | 5,762     | 0.254        | +        |
| Id2                     | 10,855    | 0.443        | +        |
| Klf2                    | 4,205     | 0.187        | -        |
| Klf4                    | 31,963    | 0.941        | -        |
| Klf5                    | 25,354    | 0.825        | -        |
| Krt8                    | 16,011    | 0.600        | +        |
| Lcp1                    | 6,801     | 0.294        | +        |
| Mbnl3                   | 24,077    | 0.799        | -        |
| Msc                     | 15,674    | 0.590        | +        |
| Msx2                    | 20,592    | 0.715        | +        |
| Nanog                   | 14,416    | 0.552        | -        |
| Pdgfa                   | 8,669     | 0.363        | +        |
| Pdgfra                  | 29,333    | 0.898        | -        |
| Pecam1                  | 11,275    | 0.455        | -        |
| Pou5f1 (NM_013633)      | 31,382    | 0.931        | -        |
| Runx1                   | 9,585     | 0.396        | -        |
| <b>Sall4</b>            | <b>71</b> | <b>0.004</b> | <b>-</b> |
| Snai1                   | 30,736    | 0.920        | +        |
| Sox13                   | 34,711    | 0.985        | +        |

|                  |        |       |   |
|------------------|--------|-------|---|
| Sox17            | 24,191 | 0.800 | + |
| Sox2 (NM_011443) | 19,297 | 0.680 | - |
| Tcf23            | 10,830 | 0.442 | + |
| Tcfap2a          | 3,939  | 0.177 | + |
| Tcfap2c          | 1,356  | 0.062 | + |
| Tspan8           | 25,470 | 0.827 | + |
| Utf1             | 15,515 | 0.587 | - |

**Table S11. PCR primers used in this work**

| Target               | Code                 | FORWARD                 | REVERSE                 | Product size (bp) | T <sub>m</sub> (°C) |
|----------------------|----------------------|-------------------------|-------------------------|-------------------|---------------------|
| Actb                 | NM_007393            | TGACAGGATGCAGAAGGAGA    | GCTGGAAGGTGGACAGTGAG    | 131               | 60                  |
| H2az                 | NM_016750            | GCGTATCACCCCTCGTCACTTG  | TCTTCTGTTGTCTTTCTTCCCG  | 146               | 58 or 60            |
| ppia (cyclophilin A) | NM_008907            | AGGGTGGTGACTTTACACGC    | AAAAGTGGGAACCGTTTGTG    | 150               | 58                  |
| H3f3a                | NM_008210            | CCATGCCAAACGTGTAACAA    | TACCTTTGACCCCATGGAAA    | 182               | 58                  |
| Gapdh                | NM_008084            | TGCGACTTCAACAGCAACTC    | ATGTAGGCCATGAGGTCCAC    | 143               | 58                  |
| Nanog                | MGF:1919200          | GCAAGCGGTGGCAGAAAAAC    | GCAATGGATGCTGGGATACTCC  | 122               | 58                  |
| Ptov1                | NM_133949            | GGATCATGGACAATGGCTTC    | TGACAAAGTTGCTCTGGTCG    | 141               | 58                  |
| 2610110g12Rik        | NM_028476            | CCCTGTACTCCCAACCTGTG    | GTGGTCTGGAGTCTGACCGT    | 133               | 58                  |
| Prr7                 | NM_001030296         | GCCTCCGAGTTACAAGCCTC    | CTGCTGAGCTCTGAGTCGGT    | 159               | 58                  |
| Klk13                | NM_001039042         | CACGTCCGTACCCTGAAACT    | ATGTTGGCAGTGATCTTCCC    | 188               | 58                  |
| Daf2                 | NM_007827            | AGGACAATGGAGCAGTCCAC    | TGAGGAGTTGGTTGGTCTCC    | 156               | 58                  |
| Rshl2a               | NM_025789            | AGAGTCTCCTCACAGCCAGC    | TTGTAAAGCCTGGATGGGTC    | 151               | 58                  |
| Mtpn                 | NM_008098            | GCAATTGCAGTGTTCAT       | AAACCCAAGTGTCAAGGG      | 174               | 58                  |
| Ubl3                 | NM_011908            | AGTGGCTGTCCTCACAGGAT    | ACCAGTTCTGCACAGTGACG    | 178               | 58                  |
| Mrpl13               | NM_026759            | TGCGGTTATAGCATCCAACA    | GCCTGGGTAGCCAGTATGTG    | 163               | 58                  |
| Mrpl55               | NM_026035            | CTATGCTCGCCTCTACCCTG    | TTCTTCCCTCTTCTGCTGGA    | 178               | 58                  |
| Cd52                 | NM_013706            | AAAGCTGCTACAGAGCCAG     | GGTGGAGGTGCTGTTTTTGT    | 167               | 58                  |
| Dach1                | NM_007826            | ACAGAGGGTGAATTGTGGCT    | TTAACTTCATCACCTGGGGC    | 153               | 58                  |
| Actb                 | NM_007393            | TGACAGGATGCAGAAGGAGA    | GCTGGAAGGTGGACAGTGAG    | 153               | 58                  |
| Twf1                 | NM_008971            | CATGTTTCGAAAGCCAAGGAT   | CCCAAGCAACAGGACAATTT    | 165               | 58                  |
| Sat1                 | NM_009121            | GACCCCTGAAGGACATAGCA    | CATGGCAACCTGGCTTAGAT    | 163               | 58                  |
| Ccdc72               | NM_183250            | CGAAGAGCTAAAAGCCAAGG    | AGGTGGCAAAGATGCTATGG    | 165               | 58                  |
| Rsu1                 | NM_009105            | GCAGATACTCAGCCTCAGGG    | GGTAACCCAGGGGTTGTTCT    | 184               | 58                  |
| H2afx                | NM_010436            | GGGCTTGAAGGTTAGTCCCT    | GCGACAGGGTCAACTGGTAT    | 180               | 58                  |
| Tapbp                | NM_009318            | CCGCTGGACTCGAACTAAAC    | GTAACCCCGACTGACCTGAA    | 157               | 58                  |
| BC088983             | NM_001009951         | GCGGAAGCTAGAACAAGTGC    | CCATTAGGAGTTCGGCTACG    | 149               | 58                  |
| Ddx59                | NM_026500            | CCCTGGACGACTTCTGGATA    | ATGCTATCTGGAATGGTGGC    | 186               | 58                  |
| Rbm22                | NM_025776            | AGGGGCTCTGAGGAAGAAAG    | GAAGACATGTGGGGAAGCAT    | 147               | 58                  |
| Ripk2                | NM_138952            | CTGCAGCCTTACCCAGAAGT    | TGACTTCTCCCAAAGAAGG     | 100               | 58                  |
| Becn1                | NM_019584            | CGGCTCCTATTCCATCAAAA    | CCTTAAAGGCAAACATCCCC    | 155               | 58                  |
| Atp1a1               | NM_144900            | TGGAGTTCACCTGCCATACA    | AGCAAGGGCTGTCTCTTCAA    | 155               | 58                  |
| Tnks                 | NM_175091            | GGCCCTTACCTTGAGGAGTC    | CAGCTCGTTCATGTGCATTT    | 154               | 58                  |
| Cenpe                | NM_173762            | GTGCATCTCCATCCTACCGT    | TTCACCAGCTGCATTTTGGAG   | 155               | 58                  |
| Ica1                 | NM_010492            | CATGACACATGCTCAGGACC    | AACACTGCAGCCCACTCTCT    | 188               | 58                  |
| Sf3b1                | NM_031179            | TCAGGAGTGTAGGCAGCTT     | AAAGAACAAGAATCCGTGCG    | 154               | 58                  |
| Cdc20                | NM_023223            | ATGGAGCAGCCTGGAGACTA    | TGTTCCAAGTGGAGGAGCTT    | 169               | 58                  |
| H3f3a                | NM_008210            | CCATGCCAAACGTGTAACAA    | TACCTTTGACCCCATGGAAA    | 182               | 58                  |
| 16S ribosomal        | Jeong et.al.2005; 71 | AGATGATCGAGCCGCGC       | GCTACCAGGGCCTTTGAGATGG, | 163               | 62                  |
| Leptin               | NM_008493            | GGATCAGGTTTTGTGGTGCT    | CTTCCTGTCACTCTTTCCCG    | 161               | 58                  |
| Stat3                | NM_213659            | CAAGCCTTTCCTGACAGAGG    | ACTGTCTCGAAGCAGAAGGC    | 182               | 58                  |
| Leptin receptor      | NM_146146            | GGTCTCAGAGCACCCAGGTA    | GCCTCAGTGGGGAATGATTA    | 168               | 58                  |
| D-loop               | Dai/Wei et.al        | ATAAACATTACTCTGGTCTTGTA | ATTAATAAGGCCAGGACCAAACC | 1100              | 58                  |

|                    |                       |                        |                         |     |       |
|--------------------|-----------------------|------------------------|-------------------------|-----|-------|
| D-Loop 5' fragment | Dai et.al.2005; 208   | CCACCACCAGCACCCAAAG    | CGGGTTGTTGGTTTCACGG     | 342 | 58    |
| mtDNA              | Gois/Bogue et.al      | GGATCCTACTCTCTACAAACAC | CTATTGTCCTAGAAATAAGAGGG | 500 | 58&60 |
| mt-Co1             | Larsson/Clayton et.al | CCCAATTCTCTACCAGCATC   | GGCTCATAGTATAGCTGGAG    | 250 | 58&60 |
| XP VegT            | NM_001088196          | GGCAAATTTGGTGTTCAT     | TGCAGAGTTAGGCAGCCTTT    | 110 | 58    |
| XP Vg1             | NM_001095591          | AGGGAGGTAGATGCCATTGA   | CACAGACAAATGCAAGACCG    | 120 | 58    |
| XP Xcat-3          | NM_001088548          | TATGTATGCCATCCCCAGT    | TGCAAGATGTCCCTGCAATA    | 136 | 58    |
| XP Xdazl           | NM_001088303          | TGGCATTGTGTAGCTTGAGG   | ACAAAGTGAACGGGGCTATG    | 110 | 58    |
| XP Fatvg           | NM_001088491          | CCATCCCTGGTGTGAGTG     | TCTTTGAGGGAAGAGGCAGA    | 120 | 58    |
| XP XNIF            | NM_001090817          | TGTGAAAAAGCTGCGAATTG   | TGATGGATTTCTGTTTGGCA    | 119 | 58    |
| XP Xlerk           | NM_001087479          | CCTGTCCCTAAGCACACTGG   | TAGACAGGGTGGCCGTAGTC    | 147 | 58    |
| XP xARH            | NM_001089091          | TGCAAATTGTCCACCACATT   | GGCCTGGGTGTATTGAGCTA    | 135 | 58    |
| XP An3             | NM_001101775          | GGTGCAGATGCACTTGAAGA   | TTTTTCCTGATCGGAATTGG    | 118 | 58    |
| XP xlan4           | NM_001087591          | GTTATTTCCAGATCTGCGGC   | CTTTGGTGGCTGATTCAGGT    | 145 | 58    |
| XP Tcf-1           | NM_001089222          | GACTTGGGAAAACGTTGCAT   | GCAGGGGTTGCAAACAGTAT    | 123 | 58    |
| XP xIPou60         | NM_001088114          | GGAGTTAATCAGCTGCCTGC   | GCGCATCTACAGCATGAGAA    | 149 | 58    |
| XP Gapdh           | NM_001087098          | CAGAGGTGCAGGTCAGAACA   | AGATCCACGACGGACACATT    | 138 | 58    |
| XP eef1a-o1        | NM_001086133          | TGAGCCTCCTTTTAGCCAGA   | CATGTTGTCTCCATGCCATC    | 130 | 58    |
